# Supplementary material for: Equisetin Restores Colistin Sensitivity against Multi-Drug Resistant Gram-Negative Bacteria
Source: MDPI journal article supplement (doi:10.3390/antibiotics10101263), 2021-10-18
Supplement: s1 [file s1]

## Supplement Materials:

**Table S1.** The FICI of antibiotics combined with equisetin against *E. coli* B2.

| Antibiotic    | MIC of Antibiotic | FICA  | MIC of Equisetin <sup>1</sup> | FICE   | FICI  |
|---------------|-------------------|-------|-------------------------------|--------|-------|
| Colistin      | 8                 | 0.125 | 1                             | 0.0001 | 0.125 |
| Rifampin      | >128              | 0.5   | 16                            | 0.5    | 1     |
| Ofloxacin     | 32                | 0.5   | 8                             | 0.5    | 1     |
| Erythromycin  | >128              | 0.5   | 16                            | 0.5    | 1     |
| Tilmicosin    | 16                | 0.5   | 4                             | 0.5    | 1     |
| Tetracyclines | >128              | 0.5   | 16                            | 0.5    | 1     |
| Kanamycin     | >128              | 0.5   | 16                            | 0.5    | 1     |
| Norfloxacin   | 32                | 0.5   | 8                             | 0.5    | 1     |
| Florfenicol   | >128              | 0.5   | 16                            | 0.5    | 1     |
| Gentamycin    | 32                | 0.5   | 8                             | 0.5    | 1     |
| Meropenem     | 4                 | 0.5   | 4                             | 0.5    | 1     |
| Ceftriaxone   | 128               | 0.5   | 16                            | 0.5    | 1     |
| Ampicillin    | >256              | 0.5   | 16                            | 0.5    | 1     |
| Tigecycline   | 0.25              | 0.5   | 4                             | 0.5    | 1     |

<sup>1</sup>In the presence of sub-MIC concentrations of antibiotics, the MIC of equisetin against *E. coli* B2.

Fractional inhibitory concentration (FIC) indices were calculated based on checkerboard broth microdilution assays. FIC index (FICI) is the sum of FICA and FICE. FICA is the FIC of tested antibiotic. FICE is the FIC of equisetin.

**Table S2.** Resistant isolates used in this study.

| Strains                               | Description                                | Reference  |
|---------------------------------------|--------------------------------------------|------------|
| <i>Escherichia coli</i> 10            | <i>mcr-1</i>                               | This study |
| <i>E. coli</i> 29                     | <i>mcr-1</i>                               | This study |
| <i>E. coli</i> 206                    | <i>mcr-1</i>                               | This study |
| <i>E. coli</i> 213                    | <i>mcr-1</i>                               | This study |
| <i>E. coli</i> 250                    | <i>mcr-1</i>                               | This study |
| <i>E. coli</i> 258                    | <i>mcr-1</i>                               | This study |
| <i>E. coli</i> B2                     | <i>bla</i> <sub>NDM-5</sub> + <i>mcr-1</i> | [1]        |
| <i>E. coli</i> 267                    | <i>mcr-1</i>                               | This study |
| <i>E. coli</i> 294                    | <i>mcr-1</i>                               | This study |
| <i>E. coli</i> 296                    | <i>mcr-1</i>                               | This study |
| <i>E. coli</i> 299                    | <i>mcr-1</i>                               | This study |
| <i>E. coli</i> 162                    | <i>mcr-1</i>                               | This study |
| <i>E. coli</i> 315                    | <i>mcr-1</i>                               | This study |
| <i>E. coli</i> 378                    | <i>mcr-1</i>                               | This study |
| <i>E. coli</i> 393                    | <i>mcr-1</i>                               | This study |
| <i>E. coli</i> 638                    | <i>mcr-1</i>                               | This study |
| <i>E. coli</i> 878                    | <i>mcr-1</i>                               | This study |
| <i>E. coli</i> 1323                   | <i>mcr-1</i>                               | This study |
| <i>E. coli</i> 1334                   | <i>mcr-1</i>                               | This study |
| <i>E. coli</i> 1336                   | <i>mcr-1</i>                               | This study |
| <i>E. coli</i> 1794                   | <i>mcr-1</i>                               | This study |
| <i>E. coli</i> 12120478               | <i>mcr-1</i>                               | This study |
| <i>E. coli</i> WZ3909                 | <i>mcr-1</i>                               | This study |
| <i>Klebsiella pneumoniae</i> 91       | <i>mcr-1</i>                               | This study |
| <i>Enterobacter cloacae</i> 16-15     | <i>mcr-1</i>                               | This study |
| <i>Raoultella planticola</i> 16-15    | <i>mcr-1</i>                               | This study |
| <i>Providencia alcalifaciens</i> 16-1 | <i>mcr-1</i>                               | This study |
| <i>Serratia marcescens</i> 16-99      | <i>mcr-1</i>                               | This study |

|                                         |              |            |
|-----------------------------------------|--------------|------------|
| <i>Raoultella ornithinolytica</i> 16-68 | <i>mcr-1</i> | This study |
| <i>Acinetobacter veronii</i> 172        | <i>mcr-3</i> | [2]        |
| <i>Acinetobacter baumannii</i> 2-38     | <i>mcr-1</i> | This study |
| <i>Salmonella enterica</i> 8H-3         | <i>mcr-1</i> | This study |

**Table S3.** MRM parameters for the determination of equisetin by LC-MS/MS

| Precursor ion<br>( <i>m/z</i> ) | Product ions<br>( <i>m/z</i> ) | Q1 pre bias<br>(V) | Collision energy<br>(eV) | Q3 pre bias<br>(V) |
|---------------------------------|--------------------------------|--------------------|--------------------------|--------------------|
| 374.30                          | 175.20                         | -19.0              | -18.0                    | -19.0              |
|                                 | 170.10                         | -11.0              | -24.0                    | -18.0              |

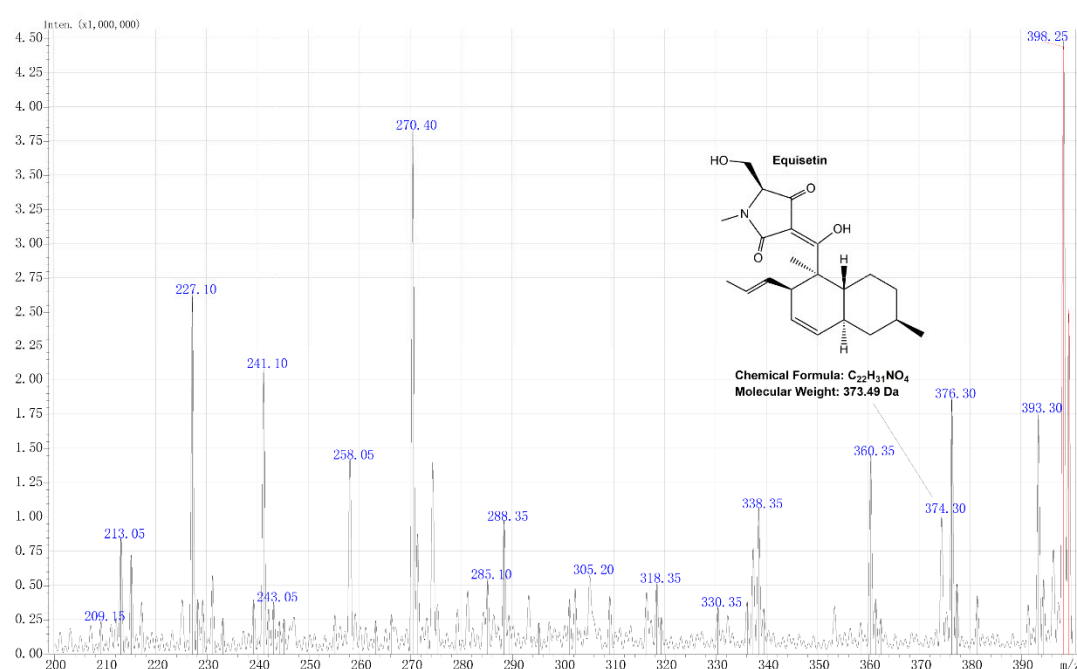

**Figure S1.** Precursor ion mass spectrum of equisetin standard solutions (1 µg/mL).

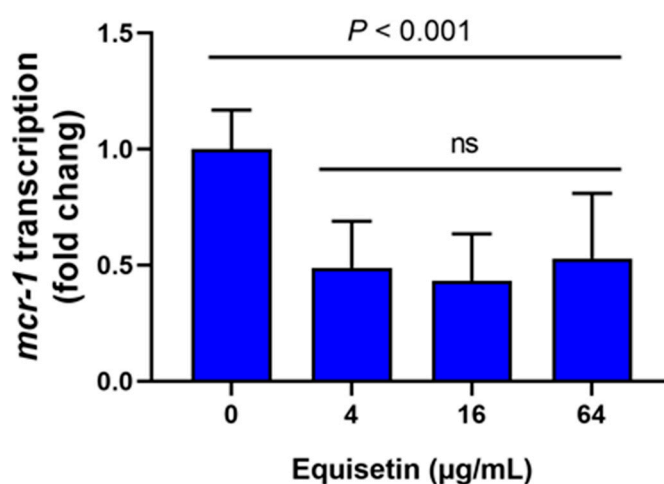

**Figure S2.** Equisetin inhibits transcription of *mcr-1* determined by reverse transcription (RT)-PCR. Data are representative of three independent experiments, and the mean of three biological

replicates is shown and error bars represent the s.d. *P* values were determined using an unpaired, two-tailed Student's *t*-test.

## References

1. Song, M.; Liu, Y.; Huang, X.; Ding, S.; Wang, Y.; Shen, J.; Zhu, K. A broad-spectrum antibiotic adjuvant reverses multidrug-resistant Gram-negative pathogens. *Nat. Microbiol.* **2020**, doi:10.1038/s41564-020-0723-z.
2. Ling, Z.; Yin, W.; Li, H.; Zhang, Q.; Wang, X.; Wang, Z.; Ke, Y.; Wang, Y.; Shen, J. Chromosome-Mediated *mcr-3* Variants in *Aeromonas veronii* from Chicken Meat. *Antimicrob. Agents. Ch.* **2017**, *61*, doi:10.1128/aac.01272-17.
